# Supplementary material for: Assessment of the Efficacy of a Low-Dose Iron Supplement in Restoring Iron Levels to Normal Range among Healthy Premenopausal Women with Iron Deficiency without Anemia
Source: MDPI journal article supplement (doi:10.3390/nu15112620), 2023-06-03
Supplement: s1 [file s1]

### Study Eligibility Criteria.

| Inclusion Criteria                                                                                                                                                                                                                                                                                                                                                                                                                                                                                                                                                                                                                                                                                                                                                                                                                                                                                                                                                                                                                                                                                                                                                                                                                                                                                                                                                                                                                                                                                                                                                                                                                                                                                                                                                                                                                                                                                                                                                                                                                                                                                                                                                                                                                                                                                                                                                                                                                                                                   |
|--------------------------------------------------------------------------------------------------------------------------------------------------------------------------------------------------------------------------------------------------------------------------------------------------------------------------------------------------------------------------------------------------------------------------------------------------------------------------------------------------------------------------------------------------------------------------------------------------------------------------------------------------------------------------------------------------------------------------------------------------------------------------------------------------------------------------------------------------------------------------------------------------------------------------------------------------------------------------------------------------------------------------------------------------------------------------------------------------------------------------------------------------------------------------------------------------------------------------------------------------------------------------------------------------------------------------------------------------------------------------------------------------------------------------------------------------------------------------------------------------------------------------------------------------------------------------------------------------------------------------------------------------------------------------------------------------------------------------------------------------------------------------------------------------------------------------------------------------------------------------------------------------------------------------------------------------------------------------------------------------------------------------------------------------------------------------------------------------------------------------------------------------------------------------------------------------------------------------------------------------------------------------------------------------------------------------------------------------------------------------------------------------------------------------------------------------------------------------------------|
| <ul style="list-style-type: none"><li>• Healthy female participants &gt; 18 years old</li><li>• Premenopausal (experiencing regular menstrual cycles)</li><li>• Hemoglobin &gt; 11.0 g/dL</li><li>• Serum ferritin &lt; 70 ng/mL</li><li>• C-reactive protein (CRP) &lt; 3 mg/L</li><li>• BMI 18-29 kg/m<sup>2</sup></li><li>• No intake of dietary supplements containing iron 30 days prior to enrollment</li><li>• Willing and able to give written informed consent</li><li>• Able to read, understand, sign and date the informed consent document (English only)</li><li>• Able and willing to comply with the schedule visit(s) and study requirements</li></ul>                                                                                                                                                                                                                                                                                                                                                                                                                                                                                                                                                                                                                                                                                                                                                                                                                                                                                                                                                                                                                                                                                                                                                                                                                                                                                                                                                                                                                                                                                                                                                                                                                                                                                                                                                                                                              |
| Exclusion Criteria                                                                                                                                                                                                                                                                                                                                                                                                                                                                                                                                                                                                                                                                                                                                                                                                                                                                                                                                                                                                                                                                                                                                                                                                                                                                                                                                                                                                                                                                                                                                                                                                                                                                                                                                                                                                                                                                                                                                                                                                                                                                                                                                                                                                                                                                                                                                                                                                                                                                   |
| <ul style="list-style-type: none"><li>• Currently taking (within the past 14 days) dietary supplements including, vitamins (any), minerals, protein shakes, vitamin water, other supplements</li><li>• History of gastrointestinal disorders that could lead to uncertain absorption of the study supplements, (i.e., inflammatory bowel disease, ulcerative colitis, Crohn's disease, colostomy, or eating disorder)</li><li>• History or current malignancy</li><li>• Receiving chemotherapy agents or radiation treatments</li><li>• Prior health issues showing high CRP or other inflammatory markers</li><li>• Pregnancy or has breast fed within 3 months prior to enrollment</li><li>• BMI &lt;18 or &gt;30 kg/m<sup>2</sup></li><li>• Diagnosis of a terminal illness</li><li>• Use of prescription medications that impact digestion (i.e., proton pump inhibitor medications, other)</li><li>• History of alcohol abuse</li><li>• History or current drug abuse</li><li>• History or current cigarette smoke (including vaping) within the past 14 days from the screening visit</li><li>• Insulin-dependent diabetes and/or metformin use</li><li>• Chronic kidney or liver disease</li><li>• Anemia</li><li>• Has significant concurrent illnesses (controlled or uncontrolled), such as diabetes, lupus, epilepsy, or cardiac disorders, hepatitis B/C, HIV, serious mental health illness such as dementia or schizophrenia; psychiatric hospitalization in the past two years, or other, which in the opinion of the investigator, such condition might be aggravated because of treatment</li><li>• The investigator feels that for any reason the participant is not eligible to participate in the study</li><li>• History of uncontrolled cardiovascular disease (i.e., myocardial infarction, hypertension, hypercholesterolemia, peripheral vascular disease, other)</li><li>• History of or current bleeding disorders (i.e., hemophilia or von Willebrand disease), or anticipated treatment with prescription anticoagulants</li><li>• Developmental disability or cognitive impairment that would preclude adequate comprehension of the informed consent form and/or ability to follow study participant requirement and/or record the necessary study measurements</li><li>• A family member of the investigator or an employee of the investigator</li><li>• Participation in any other investigational study within 30 days prior to consent</li></ul> |
